# Supplementary material for: Desalination Characteristics of Cellulose Acetate FO Membrane Incorporated with ZIF-8 Nanoparticles
Source: MDPI journal article supplement (doi:10.3390/membranes12020122), 2022-01-21
Supplement: s1 [file s1]

**Supplementary Materials:**

Table S1 Parameters of membrane preparation.

|                              |             |
|------------------------------|-------------|
| CA                           | 14 wt%      |
| PEG-400                      | 8.0 wt%     |
| 1,4-dioxane                  | 6.0 wt%     |
| ZIF-8                        | 0.2~1.0 wt% |
| Mixing temperature           | 40~80 °C    |
| Coagulation bath temperature | 25~45 °C    |
| Heat treatment temperature   | 40~80 °C    |

Table S2 Parameters of membrane testing.

|                                 |                     |
|---------------------------------|---------------------|
| Temperature                     | At room temperature |
| Extraction solution             | 1M NaCl             |
| Raw material                    | Deionized water     |
| Peristaltic pump rotating speed | 100 rpm             |
